# Supplementary material
Source: Springer Nature journal article supplement (https://www.springermedizin.de/resource/supplementary/12877_2014_1048_MOESM3_ESM.pdf/9440702)
Supplement: MOESM3 [file 9440702]

[Additional file 3] A percentage distribution age 95 to 105 for selected countries in 2010

| Age    | Japan | Sweden | Canada | U.S.A | Spain | Italy | U.K.  | Russia | Bulgaria | Norway | Ukraine |
|--------|-------|--------|--------|-------|-------|-------|-------|--------|----------|--------|---------|
| Female |       |        |        |       |       |       |       |        |          |        |         |
| 95     | 29.02 | 31.79  | 31.24  | 35.42 | 31.2  | 31.07 | 30.92 | 35.28  | 36.88    | 32.37  | 36.01   |
| 96     | 22.12 | 23.56  | 22.56  | 23.89 | 22.86 | 23.3  | 22.93 | 23.68  | 13.27    | 23.37  | 23.2    |
| 97     | 16.21 | 16.72  | 16.2   | 15.76 | 16.88 | 16.77 | 16.13 | 16.18  | 17.62    | 16.86  | 16.78   |
| 98     | 11.68 | 10.8   | 10.73  | 9.96  | 11.03 | 10.88 | 11.01 | 9.75   | 11.52    | 11.11  | 9.4     |
| 99     | 8.03  | 6.74   | 7.51   | 6.28  | 7.32  | 7.49  | 7.42  | 6.33   | 8.93     | 6.89   | 6.47    |
| 100    | 5.34  | 4.49   | 4.78   | 3.87  | 4.53  | 4.57  | 4.84  | 3.71   | 4.36     | 3.85   | 3.53    |
| 101    | 3.43  | 2.93   | 3.04   | 2.21  | 2.79  | 2.8   | 3.09  | 2.19   | 2.81     | 2.64   | 2.05    |
| 102    | 2.09  | 1.52   | 1.86   | 1.33  | 1.7   | 1.55  | 1.82  | 1.35   | 2.12     | 1.41   | 1.26    |
| 103    | 1.06  | 0.79   | 1.11   | 0.71  | 0.96  | 0.87  | 1.03  | 0.8    | 1.29     | 0.72   | 0.7     |
| 104    | 0.65  | 0.42   | 0.62   | 0.38  | 0.49  | 0.47  | 0.53  | 0.46   | 0.78     | 0.52   | 0.39    |
| 105    | 0.36  | 0.22   | 0.36   | 0.19  | 0.24  | 0.25  | 0.27  | 0.27   | 0.42     | 0.25   | 0.21    |
| Male   |       |        |        |       |       |       |       |        |          |        |         |
| 95     | 33.95 | 36.88  | 35.58  | 30.03 | 33.79 | 35.28 | 36.57 | 36.07  | 37.86    | 37.64  | 36.76   |
| 96     | 23.73 | 25.04  | 24.11  | 22.23 | 23.82 | 24.9  | 24.37 | 24.78  | 13.21    | 22.77  | 24.42   |
| 97     | 15.9  | 15.73  | 16.1   | 16.11 | 16.43 | 16.47 | 15.9  | 15.49  | 16.52    | 16.88  | 15.85   |
| 98     | 10.48 | 9.33   | 9.7    | 11.19 | 10.55 | 9.74  | 9.91  | 9.26   | 11.54    | 9.34   | 9.32    |
| 99     | 6.76  | 6.08   | 6.43   | 7.74  | 6.67  | 6.33  | 5.95  | 6.04   | 9.26     | 6.18   | 6.06    |
| 100    | 4.1   | 3.37   | 3.65   | 5.08  | 3.96  | 3.56  | 3.54  | 3.48   | 4.12     | 3.09   | 3.28    |
| 101    | 2.44  | 1.94   | 2.09   | 3.27  | 2.14  | 1.94  | 1.92  | 2.06   | 3.07     | 2.08   | 2.04    |
| 102    | 1.36  | 1.03   | 1.23   | 2.04  | 1.32  | 0.96  | 0.97  | 1.31   | 2.09     | 0.86   | 1.15    |
| 103    | 0.72  | 0.4    | 0.66   | 1.21  | 0.79  | 0.49  | 0.51  | 0.78   | 1.26     | 0.57   | 0.62    |
| 104    | 0.38  | 0.2    | 0.31   | 0.7   | 0.37  | 0.24  | 0.23  | 0.44   | 0.7      | 0.36   | 0.32    |
| 105    | 0.17  | 0      | 0.13   | 0.4   | 0.16  | 0.1   | 0.12  | 0.27   | 0.38     | 0.22   | 0.18    |
